# Supplementary material
Source: PubMed Central journal article supplement (PMC3318080)
Supplement: supp_0022034511413131_DS_10.1177_0022034511413131.pdf [file supp_0022034511413131_DS_10.1177_0022034511413131.pdf]

K. Musselmann<sup>1\*</sup>, J.A. Green<sup>1</sup>, K. Sone<sup>1</sup>,  
J.C. Hsu<sup>1</sup>, I.R. Bothwell<sup>1</sup>, S.A. Johnson<sup>1</sup>,  
J.S. Harunaga<sup>1</sup>, Z. Wei<sup>2</sup>, and K.M. Yamada<sup>1\*</sup>

<sup>1</sup>Cell Biology Section, Laboratory of Cell and Developmental Biology, Division of Intramural Research, National Institute of Dental and Craniofacial Research, 30 Convent Drive, MSC 4370, Bethesda, MD 20892, USA; and <sup>2</sup>Developmental Mechanisms Section, Division of Intramural Research, National Institute of Dental and Craniofacial Research, 30 Convent Drive, MSC 4326, Bethesda, MD 20892, USA; \*corresponding authors, kurt.musselmann@gmail.com and kenneth.yamada@nih.gov

*J Dent Res* DOI: 10.1177/0022034511413131

## APPENDIX

### EXTENDED EXPERIMENTAL PROCEDURES

#### Salivary Gland Isolation, Tissue Sections, and Laser Microdissection

Embryos from timed-pregnant mice (the morning of the day that the vaginal plug was detected was set to E0) were collected in the mid-afternoon (E12.5 and E13.5) or early morning (E14 and E15), and the salivary glands placed on Nuclepore filters after dissection as previously described (Wei *et al.*, 2007). The Nuclepore filters containing explanted SMGs were inverted onto cold OCT (Optimal Cutting Temperature compound at 4°C) in cryosection molds, and the molds were placed on the top of a brass cylinder cooled by ethanol-dry ice. After the OCT was frozen, the filter was carefully removed with forceps, and care was taken to remove the entire filter. The frozen tissue blocks were maintained in the molds at -80°C until being sectioned. A Leica CM3050S research cryostat was used to cut 10- to 14-µm frozen sections, which were collected on PEN membrane glass slides (Applied Biosystems, Carlsbad, CA, USA or Leica, Wetzlar, Germany) pre-treated with 0.01% polylysine for 5 min (Sigma, St. Louis, MO, USA) and then UV-crosslinked for 30 min in a Stratalinker (Stratagene, Santa Clara, CA, USA). The slides were frozen on dry ice and stored at -80°C. Prior to laser capture, the slides were thawed at room temperature for 10 min, stained with 0.1% toluidine blue containing 400 U/mL RNaseOut (Invitrogen, Carlsbad, CA, USA), and air-dried. Laser capture was performed with an Arcturus XT (Applied Biosystems) at the “UV-cut first” (at 15% laser intensity) setting and CapSure HS LCM caps (Applied Biosystems). At least 500 to 1000 cells were collected for each replicate at every location analyzed. The numbers of sections isolated by LCM pooled for each biological replicate are shown in the Table following this section. Cells adjacent to the microdissected areas were also collected by LCM and used to check RNA integrity of the sections by PCR.

# Salivary Gland Gene Expression Atlas Identifies a New Regulator of Branching Morphogenesis

Three sets of PCR primers for E-cadherin (E-cdh-1, -2, and -3) were designed in MacVector (MacVector Inc., Cary, NC, USA) to generate a 600-bp product 2500, 2000, and 1000 bases upstream of the 3' end of the mRNA. Laser-captured tissue samples were amplified only if the E-cdh-1 and E-cdh-2 PCR analysis of the adjacent sections showed a band of 600 nt.

Table showing numbers of pooled samples isolated by LCM for each biological replicate:

| Location/Age   | E12.5 | E13.5              | E14  | E15  |
|----------------|-------|--------------------|------|------|
| Main duct      | > 5   | > 5                | > 5  | > 5  |
| Secondary duct |       | > 10               | > 10 | > 10 |
| Bud            | > 10  | PB, > 10; CB, > 10 | > 20 | > 30 |
| Cleft          | > 20  | > 20               |      |      |

#### Microarray Analysis

Tissue samples collected by LCM were extracted with Buffer RLT (Qiagen, Valencia, CA, USA) or Trizol (Invitrogen) following the manufacturers' protocols. To facilitate RNA precipitation, we added carrier to each sample. For samples extracted in Buffer RLT, 30 ng polyinosine (Sigma-Aldrich, St. Louis, MO, USA) was added; for samples extracted in Trizol, 10 µg Glycoblue (Ambion, Carlsbad, CA, USA) was used. The purified RNA was subjected to 2 rounds of amplification with MessageAMP 2AA (Ambion) following the manufacturers' protocol, with two modifications: The ratio of aminoallyl-UTP:UTP was reduced from 1:1 to 1:3, and the Agilent Spike-In was added to each sample before the second round of amplification. Gene expression in each sample was determined with Whole Mouse Genome arrays (4 x 44k, Agilent, Santa Clara, CA, USA). The images of each array were analyzed with Agilent Feature extraction software 9.3.4 to generate gene expression values and imported into GeneSpring 11.5 (Agilent). They were processed by quantile normalization (Bolstad *et al.*, 2003) and RMA (Irizarry *et al.*, 2003). The imported files were then processed to show genes present in at least 66% of arrays. Comparisons of the expression of 4 housekeeping genes confirmed consistent expression among all of the normalized arrays

(Appendix Fig. 2A). These lists were then subjected to analysis of variance (ANOVA), followed by Tukey's *post hoc* testing to generate lists of genes expressed significantly differently ( $P < 0.05$ ) between each of the individual locations and ages (PM66 AT); the lists have been deposited in GEO as supplemental data along with tables showing the fold-changes of these genes. To validate the microarrays, we collected independent biological replicates ( $n =$  at least 3) and amplified them once using the procedure described above, then analyzed them by SYBR-Green qPCR using a StepOnePlus thermal cycler (Applied Biosystems) and calculating ddCT to determine fold change. Primers for qPCR validation were designed with BeaconDesigner (Premier Biosoft International, Palo Alto, CA, USA). The software was instructed to find amplicons within the last 1000 nucleotides of the mRNA, with amplicon lengths 75-200 bases and  $T_m = 62^\circ \pm 2^\circ\text{C}$ . Primers were purchased from Integrated DNA Technologies (IDT), Operon, or the Facility for Biotechnology Resources, CBER, Food and Drug Administration (FDA) and tested for efficiency. Only primers with efficiencies  $> 85\%$  but  $< 110\%$  were used in subsequent validation experiments.

### GSK3 $\beta$ Inhibitory Studies

E12 SMGs were cultured in medium supplemented with either 20 mM LiCl (Klein and Melton, 1996) or 20 mM NaCl (control) for up to 2 days. The inhibitor SB-216763 (S3442, Sigma-Aldrich; Cross *et al.*, 2001) was used at 10  $\mu\text{M}$  from a 40-mM stock in DMSO. BIO (6-bromoindirubin-3'-oxime; B1686, Sigma-Aldrich; Polychronopoulos *et al.*, 2004) was used at 5  $\mu\text{M}$  from a 20-mM stock in DMSO. All samples received a final concentration of 0.025% DMSO. The SMGs were photographed with a Nikon D5000 camera on an Axiovert 40C inverted microscope (Carl Zeiss, Oberkochen, Germany). Clefts from left-and-right pairs of glands (to compare control and experimental conditions using glands from the same mouse) were counted manually, and the data were analyzed for statistical significance with Prism 5 (GraphPad Software, La Jolla, CA, USA) by a one-tailed *t* test. In the LiCl washout (reversal) experiments, SMGs were treated for 16 hrs with LiCl and rinsed twice with fresh DMEM/F12, and culture was continued for 24 hrs.

### Image Processing

Photographs were processed in iPhoto (Apple, Cupertino, CA, USA), where color information was discarded, and contrast and levels were adjusted. Immunostaining images acquired with an LSM 710 confocal microscope (Carl Zeiss) were imported into MetaMorph Offline 7.5.6.0 (Molecular Devices, Sunnyvale, CA, USA), where contrast adjustment and a smoothing filter were applied.

### Whole-mount and Cryosection Immunofluorescence Microscopy

Whole SMGs were fixed and permeabilized (a) as previously described in 4% paraformaldehyde with 0.1% Triton X-100 permeabilization (Wei *et al.*, 2007; Rebutini *et al.*, 2009), or (b) in 1:1 acetone:methanol at  $-20^\circ\text{C}$  for 5 min. The glands were

then rinsed 3 times with 0.1% Tween 20/PBS for 15 min each. Non-specific binding sites were then blocked with 5% donkey serum, 1% BSA (Sigma), and M.O.M. (Vector Laboratories, Burlingame, CA, USA) in 0.1% Tween/PBS overnight at  $4^\circ\text{C}$ . The glands were then incubated with primary monoclonal antibodies against E-cadherin (ECCD-2, Invitrogen) or GSK3 $\beta$  (Cell Signaling), or with rabbit polyclonal anti-fibronectin antibody R5836 (made in-house) in 0.1% Tween/PBS (containing 8% M.O.M. protein concentrate plus 5% donkey serum) overnight at  $4^\circ\text{C}$ . Samples were then incubated with secondary antibodies conjugated to Cy2, Cy3, or Cy5 (Jackson ImmunoResearch Laboratories, West Grove, PA, USA) overnight at  $4^\circ\text{C}$  before being mounted on slides. For cryostat sectioning, SMGs were explanted at E12 and cultured until reaching stage E13.5. The glands were fixed with 1:1 acetone:methanol and then frozen in OCT as described for LCM. Cryosections (14  $\mu\text{m}$ ) were cut by means of a Leica CM3050S cryostat and collected on positively charged slides. Sections were then treated as described for whole-mount microscopy, except that the incubations were at room temperature for 1 hr. Samples were examined by confocal microscopy (LSM 510 or 710, Carl Zeiss Microimaging).

## APPENDIX REFERENCES

- Bolstad BM, Irizarry RA, Astrand M, Speed TP (2003). A comparison of normalization methods for high density oligonucleotide array data based on variance and bias. *Bioinformatics* 19:185-193.
- Cross DA, Culbert AA, Chalmers KA, Facci L, Skaper SD, Reith AD (2001). Selective small-molecule inhibitors of glycogen synthase kinase-3 activity protect primary neurones from death. *J Neurochem* 77:94-102.
- Irizarry RA, Ooi SL, Wu Z, Boeke JD (2003). Use of mixture models in a microarray-based screening procedure for detecting differentially represented yeast mutants. *Stat Appl Genet Mol Biol* 2:Article 1.
- Klein PS, Melton DA (1996). A molecular mechanism for the effect of lithium on development. *Proc Natl Acad Sci USA* 93:8455-8459.
- Polychronopoulos P, Magiatis P, Skaltsounis AL, Myriantopoulos V, Mikros E, Tarricone A, *et al.* (2004). Structural basis for the synthesis of indirubins as potent and selective inhibitors of glycogen synthase kinase-3 and cyclin-dependent kinases. *J Med Chem* 47:935-946.
- Rebutini IT, Myers C, Lassiter KS, Surmak A, Szabova L, Holmbeck K, *et al.* (2009). MT2-MMP-dependent release of collagen IV NC1 domains regulates submandibular gland branching morphogenesis. *Dev Cell* 17:482-493.
- Wei C, Larsen M, Hoffman MP, Yamada KM (2007). Self-organization and branching morphogenesis of primary salivary epithelial cells. *Tissue Eng* 13:721-735.

## APPENDIX REFERENCES FOR TABLES 1 AND 2 (MAIN ARTICLE)

1. Hashizume A, Ueno T, Furuse M, Tsukita S, Nakanishi Y, Hieda Y (2004). Expression patterns of claudin family of tight junction membrane proteins in developing mouse submandibular gland. *Dev Dyn* 231:425-431.
2. Jaskoll T, Melnick M (1999). Submandibular gland morphogenesis: stage-specific expression of TGF- $\alpha$ /EGF, IGF, TGF- $\beta$ , TNF, and IL-6 signal transduction in normal embryonic mice and the phenotypic effects of TGF- $\beta$ 2, TGF- $\beta$ 3, and EGF-r null mutations. *Anat Rec* 256:252-268.
3. Kadoya Y, Yamashina S (1993). Distribution of alpha 6 integrin subunit in developing mouse submandibular gland. *J Histochem Cytochem* 41:1707-1714.

4. Geiger S, Geiger B, Leitner O, Marshak G (1987). Cytokeratin polypeptides expression in different epithelial elements of human salivary glands. *Virchows Arch A Pathol Anat Histopathol* 410:403-414.
5. Yamaguchi Y, Yonemura S, Takada S (2006). Grainyhead-related transcription factor is required for duct maturation in the salivary gland and the kidney of the mouse. *Development* 133:4737-4748.
6. Melvin JE, Yule D, Shuttleworth T, Begenisich T (2005). Regulation of fluid and electrolyte secretion in salivary gland acinar cells. *Annu Rev Physiol* 67: 445-469.
7. Thompson-Vest N, Shimizu Y, Hunne B, Furness JB (2006). The distribution of intermediate-conductance, calcium-activated, potassium (IK) channels in epithelial cells. *J Anat* 208:219-229.
8. Begenisich T, Nakamoto T, Ovitt CE, Nehrke K, Brugnara C, Alper SL, et al. (2004). Physiological roles of the intermediate conductance, Ca<sup>2+</sup>-activated potassium channel Kcnn4. *J Biol Chem* 279:47681-47687.
9. Larsen HS, Ruus AK, Galtung HK (2009). Aquaporin expression patterns in the developing mouse salivary gland. *Eur J Oral Sci* 117:655-662.
10. Wei C, Larsen M, Hoffman MP, Yamada KM (2007). Self-organization and branching morphogenesis of primary salivary epithelial cells. *Tissue Eng* 13:721-735.
11. Zeng W, Lee MG, Yan M, Diaz J, Benjamin I, Marino CR, et al. (1997). Immuno and functional characterization of CFTR in submandibular and pancreatic acinar and duct cells. *Am J Physiol* 273:C442-C455.
12. Lee MG, Choi JY, Luo X, Strickland E, Thomas PJ, Muallem S (1999). Cystic fibrosis transmembrane conductance regulator regulates luminal Cl<sup>-</sup>/HCO<sub>3</sub><sup>-</sup> exchange in mouse submandibular and pancreatic ducts. *J Biol Chem* 274:14670-14677.
13. Bult CJ, Eppig JT, Kadin JA, Richardson JE, Blake JA (2008). The Mouse Genome Database (MGD): mouse biology and model systems. *Nucleic Acids Res* 36(Database issue):D724-728.
14. Girard LR, Castle AM, Hand AR, Castle JD, Mirels L (1993). Characterization of common salivary protein 1, a product of rat submandibular, sublingual, and parotid glands. *J Biol Chem* 268:26592-26601.
15. Lombaert IM, Hoffman MP (2010). Epithelial stem/progenitor cells in the embryonic mouse submandibular gland. *Front Oral Biol* 14:90-106.
16. Steinberg Z, Myers C, Heim VM, Lathrop CA, Rebustini IT, Stewart JS et al. (2005). FGFR2b signaling regulates ex vivo submandibular gland epithelial cell proliferation and branching morphogenesis. *Development* 132:1223-1234.
17. Knox SM, Hoffman MP (2008). Salivary Gland Development and Regeneration. In: Salivary Diagnostics. D Wong editor. Ames, Iowa: Wiley-Blackwell, p. 13.

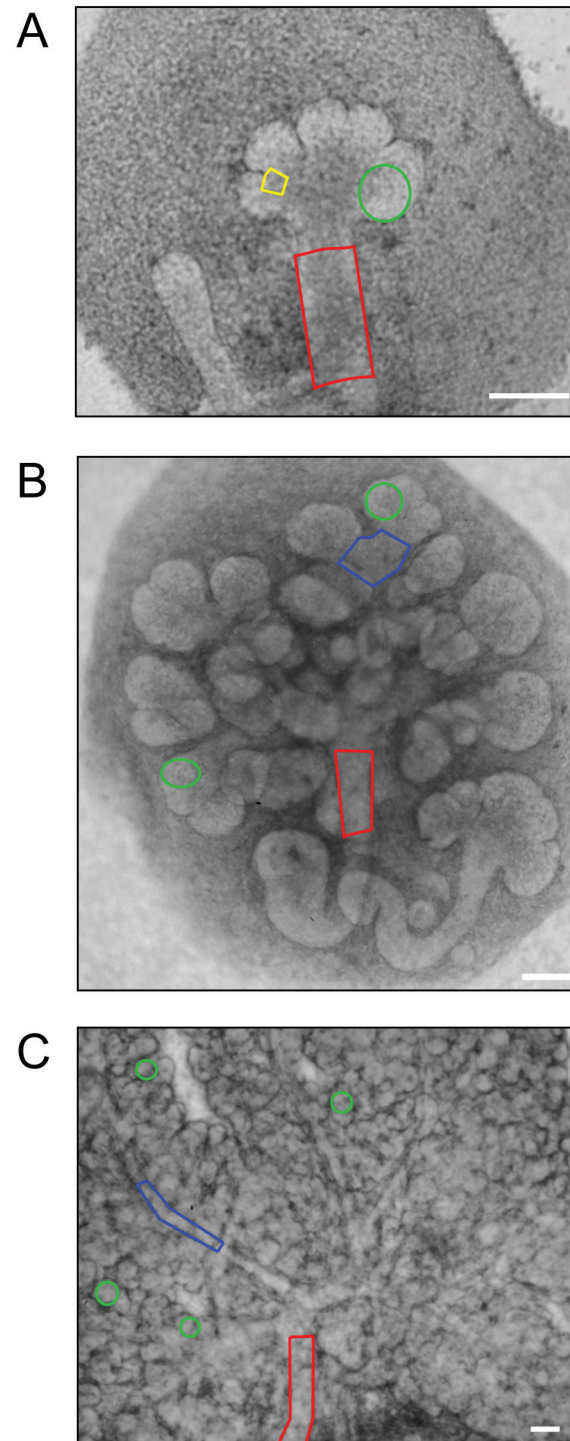

**Appendix Figure 1.** Representative Images of Submandibular Salivary Glands Indicating Locations Isolated by LCM (A) E12.5, (B) E14, and (C) E15. Color legend: red- main duct; blue- secondary duct; green- bud; yellow- cleft. Scale bar for all images = 100  $\mu$ m.

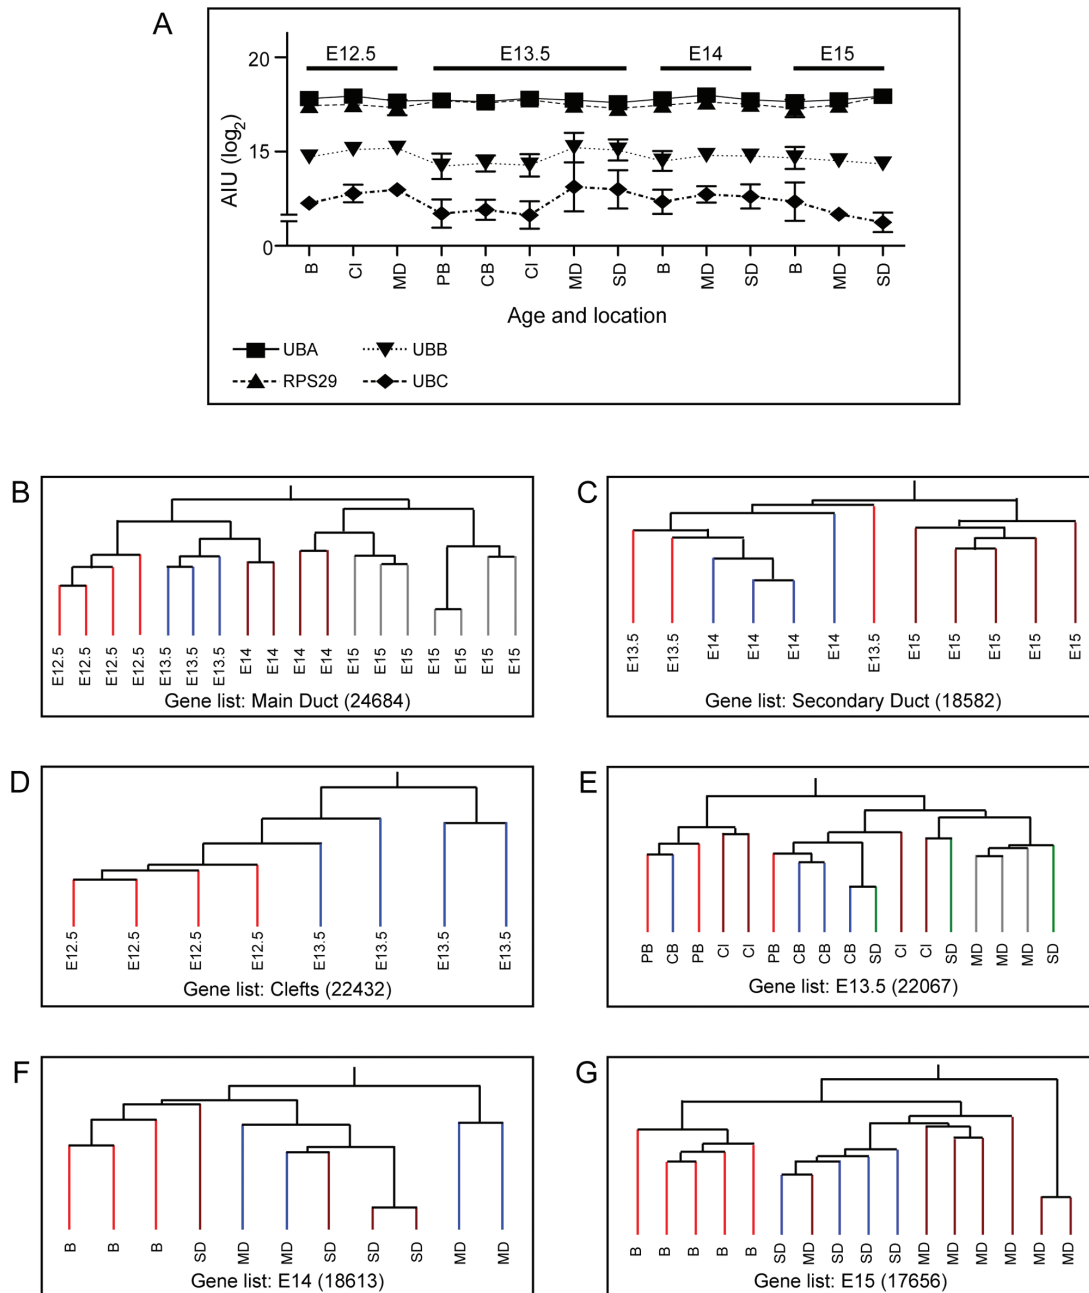

**Appendix Figure 2.** Results of Normalization and Hierarchical Clustering of Each Location and Age Samples were subjected to hierarchical clustering based on the origin of the biological replicates ("cluster on conditions" analysis based on age or location using GeneSpring). Abbreviations: CB, central bud; CI, cleft; PB, peripheral bud; MD, main duct; SD, secondary duct. The numbers in parentheses indicate the number of genes present or marginal in at least 66% of the biological replicates at each location. (A) After normalization, the expression of the four housekeeping genes *Rps29*, *Uba52*, *Ubb* and *Ubc* was found to be consistent among all of the normalized arrays (Figure 2A). The data are now available on the website <http://sgmap.nidcr.nih.gov/> in a searchable format and in GEO (Accession number GSE22828). (B-G) Clustering analysis showed that all arrays were nested, and the biological replicates clustered together compared to biological replicates at other locations. (B) Clustering of main duct arrays (24684 genes present or marginal). The E12.5 and E13.5 main duct arrays and some of the E14 arrays were nested, suggesting that gene expression in these arrays was similar. A separate nested group contained the remaining E14 arrays and all of the E15 arrays. Within the subclusters, the arrays clustered according to age. (C) Clustering of secondary duct arrays (18582 genes present or marginal). The E13.5 and E14 secondary duct arrays were nested and formed a subcluster indicating similar gene expression patterns. The E15 secondary duct arrays formed a distinct subcluster. (D) Clustering of cleft arrays (22432 genes present or marginal). The biological replicates clustered according to age. (E) Clustering of E13.5 arrays (22067 genes present or marginal). The peripheral and central bud arrays formed a nested cluster, indicating that gene expression in these arrays was very similar. The cleft arrays did not form a single distinct subcluster. The main duct arrays clustered together, but the secondary duct arrays did not. (F) Clustering of E14 arrays (18613 genes present or marginal). Main ducts and secondary ducts are nested, suggesting similarity in gene expression, but they are different from bud arrays. (G) Clustering of E15 arrays (17656 genes present or marginal). The bud arrays clustered together and are different from the main and secondary duct arrays, which are nested, suggesting similar gene expression profiles for ducts.

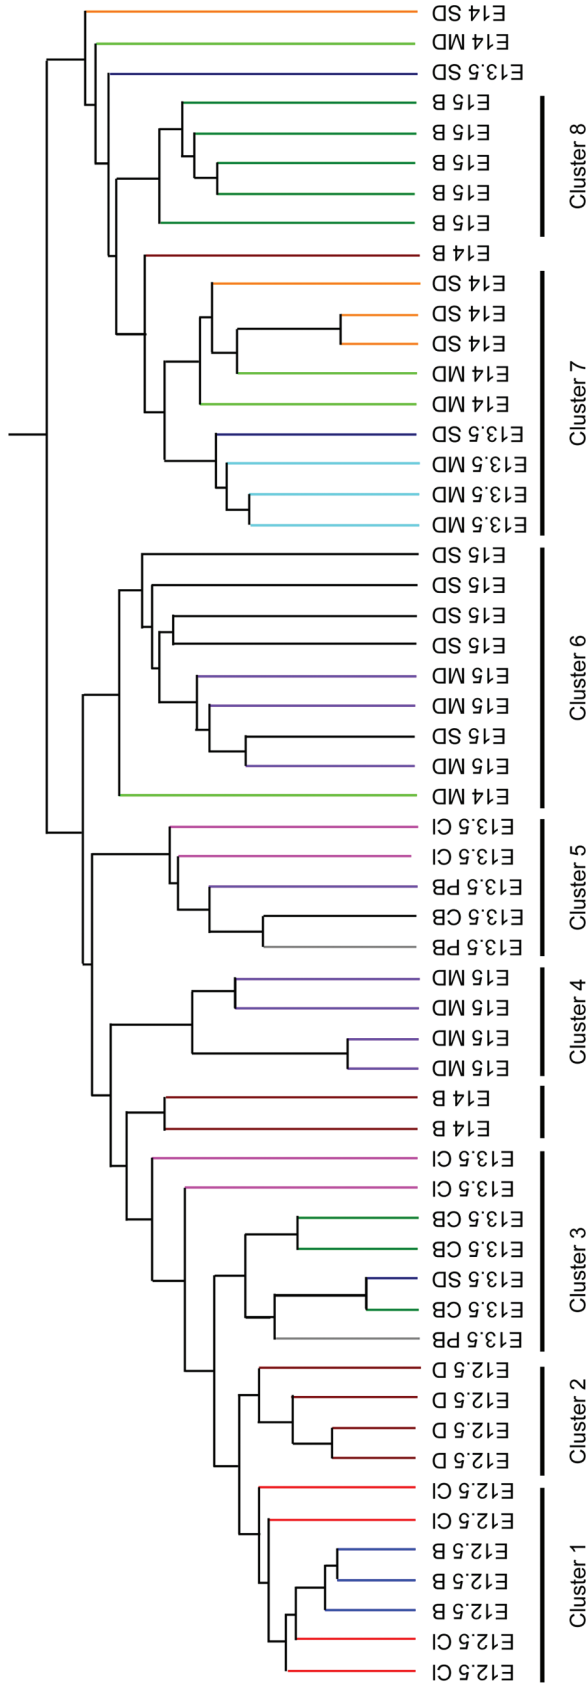

**Appendix Figure 3.** Hierarchical Cluster of All Arrays The complete dataset was subjected to hierarchical clustering on condition (age or location using GeneSpring) and the arrays clustered into 8 clusters. The E12.5 bud and cleft arrays clustered together, as did the E12.5 main duct arrays. The arrays from the E13.5 endbud structures (peripheral and central bud, and clefts) clustered together, as did the early ducts (E13.5 main duct and secondary ducts). The late ducts formed two clusters (one E15 main duct group and a group containing the E15 main and secondary ducts). The E14 bud arrays did not all cluster together, and two clustered closer to E13.5 cleft arrays. Three of the duct arrays (E13.5 secondary duct, E14 main and secondary duct) did not cluster.

**Appendix Table 1.** Bioinformatics Comparison of E15 Bud to E15 Main Duct

| Molecular Function Gene Ontology                                                                                                       |       | Up in E15 Bud Compared with E15 Main Duct   |                 |         |                                                                                                                                                                                                                                                                                                                                                                                                                  |
|----------------------------------------------------------------------------------------------------------------------------------------|-------|---------------------------------------------|-----------------|---------|------------------------------------------------------------------------------------------------------------------------------------------------------------------------------------------------------------------------------------------------------------------------------------------------------------------------------------------------------------------------------------------------------------------|
| Term                                                                                                                                   | Count | P-value                                     | Fold Enrichment | Q-value | Genes                                                                                                                                                                                                                                                                                                                                                                                                            |
| GO:0016209~anti-oxidant activity                                                                                                       | 4     | 0.02                                        | 7.42            | 0.95    | GPX2, GSR, IPO, TXNRD2                                                                                                                                                                                                                                                                                                                                                                                           |
| GO:0008047~enzyme activator activity                                                                                                   | 9     | 0.02                                        | 2.68            | 0.90    | ARHGDI3, RGS11, ACAP3, RAP1GAP, PLEKHG6, 1190002H23RIK, GFSM3, SEC14L2, MGST2                                                                                                                                                                                                                                                                                                                                    |
| GO:0003924~GTPase activity                                                                                                             | 6     | 0.03                                        | 3.48            | 0.93    | GFM2, TUBA-RS1, EFTUD2, TUBA3A, EIF5B, GNG2                                                                                                                                                                                                                                                                                                                                                                      |
| GO:0030145~manganese ion binding                                                                                                       | 6     | 0.05                                        | 3.01            | 0.97    | GALNT3, PPM1D, PHILPP2, PPM1K, ENDOG, GAIINT12                                                                                                                                                                                                                                                                                                                                                                   |
| Molecular Function Gene Ontology                                                                                                       |       | Down in E15 Bud Compared with E15 Main Duct |                 |         |                                                                                                                                                                                                                                                                                                                                                                                                                  |
| Term                                                                                                                                   | Count | P-value                                     | Fold Enrichment | Q-value | Genes                                                                                                                                                                                                                                                                                                                                                                                                            |
| GO:0046983~protein dimerization activity                                                                                               | 11    | 0.00                                        | 3.14            | 0.33    | CHKA, IKZF2, CCDC88A, EPAS1, ADH1, JUN, RUNX1T1, CREB5, PBX1, ZFP618, TGFB2                                                                                                                                                                                                                                                                                                                                      |
| GO:0008092~cytoskeletal protein binding                                                                                                | 12    | 0.00                                        | 2.81            | 0.23    | RAB11FIP5, TRIM2, KIF1B, CCDC88A, CLMN, CEP290, CLIP1, SCNN1A, ADD3, VILL, PLS3, APC                                                                                                                                                                                                                                                                                                                             |
| GO:0043167~ion binding                                                                                                                 | 54    | 0.01                                        | 1.33            | 0.51    | ATP1B1, PSTK, VILL, CNOT4, TRIM2, P4HA2, CAT, GM5595, AGAP1, NT5E, PLS3, ZCCHC7, RREB1, RUNX1T1, CFTR, COLEC12, CDO1, THBD, CLIC6, 2810408P10RIK, CLIP1, PGCP, LRRK1, ADD3, NSD1, TRIM39, ALOX12, PHYHD1, TSHZ3, CLCN2, PPP2R3A, CYP2F2, ZFP618, ADH1, CASZ1, SLC4A7, PLCD1, SCNN1A, ZBTB7C, IKZF2, L3MBTL2, CREB5, PCDH17, MANBA, ITPR2, NOTCH2, JHDM1D, CDKN1A, PRICKLE1, SULF2, FBIN5, PLCG2, MPPED2, GPATCH8 |
| GO:0030528~transcription regulator activity                                                                                            | 21    | 0.02                                        | 1.69            | 0.66    | TSHZ3, IKZF2, EPAS1, MAFB, RUNX1T1, TEAD1, CREB5, DACHI, PPARGC1A, PPARGC1B, TCFP2L1, MYCL1, MEIS2, JUN, NFAT5, CEP290, PBX1, RUNX1, LCOR, NSD1, RUNX2                                                                                                                                                                                                                                                           |
| GO:0003700~transcription factor activity                                                                                               | 15    | 0.03                                        | 1.87            | 0.70    | TSHZ3, EPAS1, MAFB, RUNX1T1, TEAD1, CREB5, DACHI, MYCL1, MEIS2, JUN, NFAT5, PBX1, RUNX1, LCOR, RUNX2                                                                                                                                                                                                                                                                                                             |
| GO:0016702~oxidoreductase activity, acting on single donors with incorporation of molecular oxygen, incorporation of 2 atoms of oxygen | 4     | 0.03                                        | 5.71            | 0.71    | PHYHD1, P4HA2, CDO1, ALOX12                                                                                                                                                                                                                                                                                                                                                                                      |
| GO:0043169~cation binding                                                                                                              | 51    | 0.03                                        | 1.27            | 0.65    | ATP1B1, PSTK, VILL, CNOT4, TRIM2, P4HA2, CAT, GM5595, AGAP1, NT5E, PLS3, ZCCHC7, RREB1, RUNX1T1, COLEC12, CDO1, THBD, 2810408P10RIK, CLIP1, PGCP, ADD3, NSD1, LRRK1, TRIM39, ALOX12, PHYHD1, TSHZ3, PPP2R3A, CYP2F2, ZFP618, ADH1, CASZ1, SLC4A7, PLCD1, SCNN1A, ZBTB7C, IKZF2, L3MBTL2, CREB5, PCDH17, MANBA, ITPR2, NOTCH2, JHDM1D, CDKN1A, SULF2, PRICKLE1, FBIN5, PLCG2, MPPED2, GPATCH8                     |
| GO:0019838~growth factor binding                                                                                                       | 4     | 0.04                                        | 5.39            | 0.65    | IGF1R, IL1RL2, PDGFRA, CYR61                                                                                                                                                                                                                                                                                                                                                                                     |
| GO:0015293~symporter activity                                                                                                          | 5     | 0.05                                        | 3.67            | 0.67    | SLC16A2, SLC6A9, SLC16A11, SLC6A6, SLC4A7                                                                                                                                                                                                                                                                                                                                                                        |
| GO:0042803~protein homodimerization activity                                                                                           | 6     | 0.05                                        | 3.02            | 0.66    | CHKA, IKZF2, CCDC88A, ADH1, RUNX1T1, TGFB2                                                                                                                                                                                                                                                                                                                                                                       |
| KEGG Pathways                                                                                                                          |       | Up in E15 Bud Compared with E15 Main Duct   |                 |         |                                                                                                                                                                                                                                                                                                                                                                                                                  |
| Term                                                                                                                                   | Count | P-value                                     | Fold Enrichment | Q-value | Genes                                                                                                                                                                                                                                                                                                                                                                                                            |
| mmu03040:Spliceosome                                                                                                                   | 6     | 0.02                                        | 3.65            | 0.75    | BCAS2, PPIH, EFTUD2, SNRNP, LSM2, SF3B5                                                                                                                                                                                                                                                                                                                                                                          |

(continued)

**Appendix Table 1. (continued)**

| KEGG Pathways                                  |       | Down in E15 Bud Compared with E15 Main Duct |                 |         |                                                          |
|------------------------------------------------|-------|---------------------------------------------|-----------------|---------|----------------------------------------------------------|
| Term                                           | Count | P-value                                     | Fold Enrichment | Q-value | Genes                                                    |
| mmu05210:Colorectal cancer                     | 7     | 0.00                                        | 7.78            | 0.01    | IGF1R, FZD10, JUN, PDGFRA, AXIN2, APC, TGFB2             |
| mmu04310:Wnt signaling pathway                 | 8     | 0.00                                        | 5.13            | 0.02    | CSNK1A1, WNT10A, FZD10, PRICKLE1, JUN, NFAT5, AXIN2, APC |
| mmu05217:Basal cell carcinoma                  | 4     | 0.02                                        | 6.96            | 0.36    | WNT10A, FZD10, AXIN2, APC                                |
| mmu05214:Glioma                                | 4     | 0.03                                        | 5.98            | 0.41    | IGF1R, CDKN1A, PLCG2, PDGFRA                             |
| mmu04070:Phosphatidylinositol signaling system | 4     | 0.04                                        | 5.10            | 0.48    | INPP5K, PLCG2, PLCD1, ITPR2                              |

We generated gene lists by identifying genes whose expression differed 5-fold or higher among the bud, main duct, and secondary duct of E15 salivary glands. These lists were analyzed by DAVID (Database for Annotation, Visualization and Integrated Discovery) to identify overrepresented pathways and molecular function gene ontology terms. P-values for each group of genes were calculated by DAVID with a modified Fisher's Exact test (EASE-score). Fold enrichment numbers were calculated as the ratio of the percentage of the genes belonging to the pathway in the gene list compared with the percentage expected by chance alone, and the Benjamini-Hochberg procedure was used to determine the false discovery rate (Q-value).



**Appendix Table 2.** Bioinformatics Comparison of E15 Bud to E15 Secondary Duct

| Molecular Function Gene Ontology                               |       |         |                 |         |                                                                                                                                                                                                                                                                    |
|----------------------------------------------------------------|-------|---------|-----------------|---------|--------------------------------------------------------------------------------------------------------------------------------------------------------------------------------------------------------------------------------------------------------------------|
| Term                                                           | Count | P-value | Fold Enrichment | Q-value | Genes                                                                                                                                                                                                                                                              |
| GO:0008047~enzyme activator activity                           | 7     | 0.00    | 4.79            | 0.45    | ARHGDIG, RALGAPA1, CAV1, RGS2, RAP1GAP, I190002H23RIK, GFSM3                                                                                                                                                                                                       |
| GO:0005509~calcium ion binding                                 | 11    | 0.02    | 2.23            | 0.88    | ITGA6, GALNT7, PLS1, PADI2, DIK1, GALNT12, PROS1, CANX, GAS6, MYL9, PCDH18                                                                                                                                                                                         |
| GO:0030528~transcription regulator activity                    | 13    | 0.04    | 1.84            | 0.88    | SOX7, CITED1, MAPK1, HEY1, BHLHA15, GTF2A2, TEAD4, SPDEF, FABP4, ETV1, ID4, CREB3L4, MYB                                                                                                                                                                           |
| Molecular Function Gene Ontology                               |       |         |                 |         |                                                                                                                                                                                                                                                                    |
| Term                                                           | Count | P-value | Fold Enrichment | Q-value | Genes                                                                                                                                                                                                                                                              |
| GO:0043167~ion binding                                         | 37    | 0.01    | 1.44            | 0.92    | TSHZ3, ATP1B1, CLCN2, ITBP2, CYP2F2, ADCY8, ITBP4, VILL, CD97, TRIM2, P4HA2, ADH1, ITF, ZFP521, GM5595, NT5E, RASA2, IKZF2, ZBTB7C, CFTR, CDO1, MANBA, MMP11, ITPR2, CDKN1A, THBD, PRICKLE1, SULF2, FBLN5, CUC6, PLCG2, MPPED2, LIME1, PGCP, IRRK1, ADAM15, ALOX12 |
| GO:0015293~symporter activity                                  | 5     | 0.01    | 5.79            | 0.73    | SLC16A2, SLC6A9, SLC22A18, SLC16A11, SLC6A6                                                                                                                                                                                                                        |
| GO:0070011~peptidase activity, acting on L-amino acid peptides | 9     | 0.04    | 2.28            | 0.97    | TMPRSS2, KIK1B8, PGPEP1, PSEN1, ITF, HP, PGCP, ADAM15, MMP11                                                                                                                                                                                                       |
| GO:0005160~transforming growth factor beta receptor binding    | 2     | 0.04    | 43.64           | 0.89    | TGFB3, TGFB2                                                                                                                                                                                                                                                       |
| KEGG Pathways                                                  |       |         |                 |         |                                                                                                                                                                                                                                                                    |
| Term                                                           | Count | P-value | Fold Enrichment | Q-value | Genes                                                                                                                                                                                                                                                              |
| mmu04510:Focal adhesion                                        | 5     | 0.04    | 3.62            | 0.98    | MAPK1, LAMA4, CAV1, ITGA6, MYL9                                                                                                                                                                                                                                    |
| mmu00480:Glutathione metabolism                                | 3     | 0.05    | 8.28            | 0.90    | LAP3, GPX2, GGCT                                                                                                                                                                                                                                                   |
| KEGG Pathways                                                  |       |         |                 |         |                                                                                                                                                                                                                                                                    |
| Term                                                           | Count | P-value | Fold Enrichment | Q-value | Genes                                                                                                                                                                                                                                                              |
| mmu05200:Pathways in cancer                                    | 9     | 0.00    | 4.10            | 0.08    | WNT10A, CDKN1A, EPAS1, SOS1, JUN, PLCG2, TGFB3, AXIN2, TGFB2                                                                                                                                                                                                       |
| mmu05211:Renal cell carcinoma                                  | 5     | 0.00    | 10.51           | 0.04    | EPAS1, SOS1, JUN, TGFB3, TGFB2                                                                                                                                                                                                                                     |
| mmu05210:Colorectal cancer                                     | 5     | 0.00    | 8.55            | 0.06    | SOS1, JUN, TGFB3, AXIN2, TGFB2                                                                                                                                                                                                                                     |
| mmu04020:Calcium signaling pathway                             | 6     | 0.01    | 4.62            | 0.15    | PHKA2, EDNRA, ADCY8, PLCG2, ITPKA, ITPR2                                                                                                                                                                                                                           |
| mmu04310:Wnt signaling pathway                                 | 5     | 0.02    | 4.94            | 0.20    | WNT10A, PSEN1, PRICKLE1, JUN, AXIN2                                                                                                                                                                                                                                |
| mmu04012:ErbB signaling pathway                                | 4     | 0.02    | 6.76            | 0.20    | CDKN1A, SOS1, JUN, PLCG2                                                                                                                                                                                                                                           |
| mmu04912:GnRH signaling pathway                                | 4     | 0.03    | 6.07            | 0.23    | ADCY8, SOS1, JUN, ITPR2                                                                                                                                                                                                                                            |

We generated gene lists by identifying genes whose expression differed 5-fold or higher among the bud, main duct, and secondary duct of E15 salivary glands. These lists were analyzed by DAVID (Database for Annotation, Visualization and Integrated Discovery) to identify overrepresented pathways and molecular function gene ontology terms. P-values for each group of genes were calculated by DAVID with a modified Fisher's Exact test (EASE-score). Fold enrichment numbers were calculated as the ratio of the percentage of the genes belonging to the pathway in the gene list compared with the percentage expected by chance alone, and the Benjamini-Hochberg procedure was used to determine the false discovery rate (Q-value).

**Appendix Table 3.** Bioinformatics Comparison of E15 Main Duct to E15 Secondary Duct

| Molecular Function Gene Ontology            |       | Up in E15 Main Duct Compared with E15 Secondary Duct   |                 |         |                                                                                                                                                                                                              | Genes |
|---------------------------------------------|-------|--------------------------------------------------------|-----------------|---------|--------------------------------------------------------------------------------------------------------------------------------------------------------------------------------------------------------------|-------|
| Term                                        | Count | P-value                                                | Fold Enrichment | Q-value |                                                                                                                                                                                                              |       |
| GO:0008017~microtubule binding              | 4     | 0.00                                                   | 17.09           | 0.16    | KIF1B, CCDC88A, CEP290, CLIP1                                                                                                                                                                                |       |
| GO:0008092~cytoskeletal protein binding     | 7     | 0.00                                                   | 4.41            | 0.16    | MTSS1, KIF1B, CCDC88A, LIMCH1, CEP290, CLIP1, SYNPO                                                                                                                                                          |       |
| GO:0030528~transcription regulator activity | 12    | 0.00                                                   | 2.59            | 0.12    | TAF7, ZFP449, RUNX1T1, CEP290, FABP4, CREB5, PBX1, ZEB2, SOX7, ICOR, FOXN3, TCFCP2L1                                                                                                                         |       |
| GO:0003700~transcription factor activity    | 8     | 0.03                                                   | 2.69            | 0.44    | ZFP449, RUNX1T1, CREB5, PBX1, ZEB2, SOX7, ICOR, FOXN3                                                                                                                                                        |       |
| GO:0046983~protein dimerization activity    | 5     | 0.04                                                   | 3.83            | 0.53    | CCDC88A, RUNX1T1, CREB5, PBX1, TERF2                                                                                                                                                                         |       |
| GO:0016564~transcription repressor activity | 4     | 0.04                                                   | 4.94            | 0.53    | RUNX1T1, FABP4, ZEB2, TCFCP2L1                                                                                                                                                                               |       |
| Molecular Function Gene Ontology            |       | Down in E15 Main Duct Compared with E15 Secondary Duct |                 |         |                                                                                                                                                                                                              | Genes |
| Term                                        | Count | P-value                                                | Fold Enrichment | Q-value |                                                                                                                                                                                                              |       |
| GO:0046872~metal ion binding                | 28    | 0.00                                                   | 1.61            | 0.57    | ADAMTS18, PHILPP2, MYL10, DMPK, PCDH1, MAP3K4, ANG, FXC1, ZFP296, EFCAB2, ENTPD4, MT4, ZFYVE1, SLC12A8, ADARB1, CRIP3, GDE1, ZMYM6, ATP1A3, IDO2, ACLY, ZFP606, MID1, CACNA2D3, PTHLH, PIPNMM2, RNF6, ZNHIT1 |       |
| GO:0019208~phosphatase regulator activity   | 3     | 0.01                                                   | 16.61           | 0.48    | SBF2, PPP2R5A, PPP2R5C                                                                                                                                                                                       |       |
| GO:0005543~phospholipid binding             | 4     | 0.02                                                   | 7.44            | 0.45    | PIPNMM2, SBF2, ZFYVE1, SNX11                                                                                                                                                                                 |       |
| GO:0000287~magnesium ion binding            | 6     | 0.03                                                   | 3.25            | 0.67    | MAP3K4, GDE1, ATP1A3, ACLY, ENTPD4, DMPK                                                                                                                                                                     |       |
| KEGG Pathway                                |       | Up in E15 Main Duct Compared with E15 Secondary Duct   |                 |         |                                                                                                                                                                                                              | Genes |
| None                                        |       |                                                        |                 |         |                                                                                                                                                                                                              |       |
| KEGG Pathway                                |       | Down in E15 Main Duct Compared with E15 Secondary Duct |                 |         |                                                                                                                                                                                                              | Genes |
| mmu05211:Renal cell carcinoma               | 3     | 0.03                                                   | 11.18           | 0.82    | PGF, SOS1, GAB1                                                                                                                                                                                              |       |

We generated gene lists by identifying genes whose expression differed 5-fold or higher among the bud, main duct, and secondary duct of E15 salivary glands. These lists were analyzed by DAVID (Database for Annotation, Visualization and Integrated Discovery) to identify overrepresented pathways and molecular function gene ontology terms. P-values for each group of genes were calculated by DAVID with a modified Fisher's Exact test (EASE-score). Fold enrichment numbers were calculated as the ratio of the percentage of the genes belonging to the pathway in the gene list compared with the percentage expected by chance alone, and the Benjamini-Hochberg procedure was used to determine the false discovery rate (Q-value).

**Appendix Table 4.** Molecular Function Analysis of Genes Used for qPCR Validation

| Molecular Function Gene Ontology                      |       | Genes from Literature Used for qPCR Validation               |  |
|-------------------------------------------------------|-------|--------------------------------------------------------------|--|
| Term                                                  | Count | Genes                                                        |  |
| GO:0005198~structural molecule activity               | 9     | KRT19, KRT18, KRT17, CLDN4, CLDN3, CLDN6, KRT7, KRT8, CLDN11 |  |
| GO:0042802~identical protein binding                  | 4     | CLDN4, CLDN3, CLDN6, CLDN11                                  |  |
| GO:0022838~substrate specific channel activity        | 4     | AQP5, CFTR, SCNN1B, SCNN1A                                   |  |
| GO:0015267~channel activity                           | 4     | AQP5, CFTR, SCNN1B, SCNN1A                                   |  |
| GO:0022803~passive transmembrane transporter activity | 4     | AQP5, CFTR, SCNN1B, SCNN1A                                   |  |
| GO:0050699~WW domain binding                          | 2     | SCNN1B, SCNN1A                                               |  |
| GO:0019903~protein phosphatase binding                | 2     | CDH1, CTNNB1                                                 |  |
| GO:0019902~phosphatase binding                        | 2     | CDH1, CTNNB1                                                 |  |
| GO:0005272~sodium channel activity                    | 2     | SCNN1B, SCNN1A                                               |  |
| GO:0005216~ion channel activity                       | 3     | CFTR, SCNN1B, SCNN1A                                         |  |

**Appendix Table 5.** Embryonic Day 15 Bud vs. Embryonic Day 12.5 Bud, Selected Functions, and Pathways of Genes Differentially Expressed

| Gene Symbol                                                    | Fold Change in Microarray | Fold Change by qPCR | References with Localization Data          |
|----------------------------------------------------------------|---------------------------|---------------------|--------------------------------------------|
| <b>Substrate specific transport</b>                            |                           |                     |                                            |
| Kcnn4                                                          | 10.9                      | 6.5                 | <b>IF: late bud;</b> Appendix Ref. 6, 7, 8 |
| Aqp5                                                           | 1219                      | 38                  | <b>qPCR: late bud;</b> Appendix Ref. 9, 10 |
| <b>Transcription activator activity</b>                        |                           |                     |                                            |
| Rnf6                                                           | 117                       | –                   | –                                          |
| Nfix                                                           | 26.1                      | –                   | –                                          |
| Cited2                                                         | 17.3                      | –                   | –                                          |
| Cited4                                                         | 20.7                      | –                   | –                                          |
| Lef1                                                           | –52                       | –                   | –                                          |
| Foxc2                                                          | –20                       | –                   | –                                          |
| Smad3                                                          | –16.5                     | –                   | –                                          |
| Etv4                                                           | –4.5                      | –                   | <b>qPCR: E13 bud;</b> Appendix Ref. 15     |
| Etv5                                                           | –6                        | –                   | <b>qPCR: E13 bud;</b> Appendix Ref. 15     |
| <b>Enzyme inhibitory activity/peptidase inhibitor activity</b> |                           |                     |                                            |
| Wfdc3                                                          | 59.1                      | –                   | –                                          |
| Bc048546                                                       | 31.1                      | –                   | –                                          |
| Expi                                                           | 176.5                     | –                   | –                                          |
| Ppp1R1b                                                        | 18.9                      | –                   | –                                          |
| Serpinb12                                                      | 43                        | –                   | –                                          |
| Tesc                                                           | 80.8                      | –                   | –                                          |
| <b>Metallopeptidase activity</b>                               |                           |                     |                                            |
| Mmp2                                                           | –359.0                    | –110                | <b>qPCR: E13 SMG;</b> Appendix Ref. 16     |
| Adamts19                                                       | –22.5                     | –                   | –                                          |
| Adamts4                                                        | –15.8                     | –                   | –                                          |
| Adamts8                                                        | –51.9                     | –                   | –                                          |
| <b>No function assigned</b>                                    |                           |                     |                                            |
| Dcpp1                                                          | 3477                      | d                   | <b>ISH: E14.5;</b> Appendix Ref. 13, 14    |
| Pip                                                            | 150                       | 11                  | <b>qPCR: E15 SMG;</b> Appendix Ref. 10     |
| Smgc                                                           | 444                       | d                   | <b>qPCR: E15 SMG;</b> Appendix Ref. 17     |
| <b>Heme binding</b>                                            |                           |                     |                                            |
| Hba-A1                                                         | 38.8                      | –                   | –                                          |
| Hbb-B1                                                         | 55.2                      | –                   | –                                          |
| Cyp4B1                                                         | 99.6                      | –                   | –                                          |
| Cyp51                                                          | 48.8                      | –                   | –                                          |
| Lpo                                                            | 19.4                      | –                   | –                                          |
| <b>KEGG: Pathways in cancer</b>                                |                           |                     |                                            |
| Fgfr2                                                          | –15                       | –3.5                | <b>IF: E13 SMG;</b> Appendix Ref. 16       |
| Wnt10a                                                         | –17                       | –                   | –                                          |
| E2F2                                                           | 18                        | –                   | –                                          |
| Map2k1                                                         | –22.6                     | –                   | –                                          |
| Rxra                                                           | –12.2                     | –                   | –                                          |
| Smad3                                                          | –16.5                     | –                   | –                                          |
| Lef1                                                           | –52                       | –                   | –                                          |
| Mmp2                                                           | –359                      | –110                | <b>qPCR: E13 SMG;</b> Appendix Ref. 16     |

For abbreviations, please refer to Table 1 (main article).

**Appendix Table 6.** Bioinformatics Comparison of E15 Bud to E12.5 Bud

| Molecular Function Gene Ontology            |       | Up in E12.5 Bud Compared with E15 Bud |                 |         |                                                                                                                                                                                                                                                                                                                                                                                                                                                                                                                                                                                                                                                                                                     |
|---------------------------------------------|-------|---------------------------------------|-----------------|---------|-----------------------------------------------------------------------------------------------------------------------------------------------------------------------------------------------------------------------------------------------------------------------------------------------------------------------------------------------------------------------------------------------------------------------------------------------------------------------------------------------------------------------------------------------------------------------------------------------------------------------------------------------------------------------------------------------------|
| Term                                        | Count | P-value                               | Fold Enrichment | Q-value | Genes                                                                                                                                                                                                                                                                                                                                                                                                                                                                                                                                                                                                                                                                                               |
| GO:0008237~metallopeptidase activity        | 10    | 0.01                                  | 2.81            | 0.97    | ADAMTS9, ADAMTS19, ADAMTS8, COPS5, THSD4, CPXM2, ADAMTS3, MMP2, ADAMTS4, CPZ                                                                                                                                                                                                                                                                                                                                                                                                                                                                                                                                                                                                                        |
| GO:0046914~transition metal ion binding     | 66    | 0.01                                  | 1.33            | 0.83    | GM6685, PXDN, COPS5, BC027344, ZFP334, UTRN, RNF214, ZNRF1, MMP2, ZFP786, RBM4B, ZFP91, RNF219, TIMM9, RARB, 6330439K17RIK, CPXM2, ZHX3, UBR1, MBNL1, GALNTL1, 5730601F06RIK, NUDT11, ZFP592, NEBL, ADAMTS9, ADAMTS8, PPM1K, ZDHHC13, ACAP2, ADAMTS3, STEAP1, TRIM39, ADAMTS4, CYP1B1, ADAMTS19, AKAP13, MYO9A, CPZ, TRIM11, ZFP317, RNF160, ZFP451, ZFP192, RASGRP1, RNFT2, SLIC39A8, SLIC30A9, LOC100045359, GALNTI14, SCO1, ZC3H12C, DNMT3A, ZFP386, FADS1, SMG1, TRIM25, ZFP2, ZFP606, ISL1, RIMKLA, CDKN1A, RNF150, ZFP182, ZFP773, ZMYND17                                                                                                                                                    |
| GO:0016563~transcription activator activity | 12    | 0.01                                  | 2.43            | 0.73    | KAT2B, COPS5, CAMK4, LEFT, ATP6V0A1, FOXC2, SMAD3, TBX1, POU3F1, MED13, RBM39, RARB                                                                                                                                                                                                                                                                                                                                                                                                                                                                                                                                                                                                                 |
| GO:0008270~zinc ion binding                 | 54    | 0.02                                  | 1.35            | 0.78    | COPS5, BC027344, ZFP334, UTRN, ZNRF1, RNF214, MMP2, ZFP786, ZFP91, RBM4B, RNF219, TIMM9, RARB, 6330439K17RIK, CPXM2, ZHX3, 5730601F06RIK, MBNL1, UBR1, ZFP592, NEBL, ADAMTS9, ADAMTS8, ZDHHC13, ACAP2, ADAMTS3, TRIM39, ADAMTS4, ADAMTS19, AKAP13, MYO9A, CPZ, TRIM11, ZFP317, ZFP451, RNF160, ZFP192, RASGRP1, RNFT2, SLIC39A8, SLIC30A9, LOC100045359, ZC3H12C, DNMT3A, ZFP386, TRIM25, ZFP2, ISL1, ZFP606, CDKN1A, RNF150, ZFP182, ZFP773, ZMYND17                                                                                                                                                                                                                                               |
| GO:0004222~metalloendopeptidase activity    | 7     | 0.02                                  | 3.23            | 0.79    | ADAMTS9, ADAMTS19, ADAMTS8, THSD4, ADAMTS3, MMP2, ADAMTS4                                                                                                                                                                                                                                                                                                                                                                                                                                                                                                                                                                                                                                           |
| GO:0003682~chromatin binding                | 8     | 0.03                                  | 2.71            | 0.83    | CHD9, DNMT3A, ZFP386, LEFT, ATP6V0A1, FOXC2, ISL1, PITX2                                                                                                                                                                                                                                                                                                                                                                                                                                                                                                                                                                                                                                            |
| GO:0046872~metal ion binding                | 88    | 0.03                                  | 1.20            | 0.80    | PXDN, GM6685, ITBP1, COPS5, BC027344, NPNT, ZFP334, UTRN, NCS1, RNF214, ZNRF1, MMP2, ZFP786, RBM4B, ZFP91, RNF219, TIMM9, RARB, TRPV6, SLIC12A7, 6330439K17RIK, REV1, SCN2B, PFKP, ZHX3, CPXM2, PCDH8, UBR1, MBNL1, GALNTL1, NUDT11, 5730601F06RIK, ZFP592, NEBL, ADAMTS9, ADAMTS8, CAMK4, PPM1K, ZDHHC13, ACAP2, FKBP14, ADAMTS3, STEAP1, ADD3, TRIM39, ADAMTS4, CYP1B1, ADAMTS19, AKAP13, MYO9A, TRIM11, ZFP317, CPZ, RNF160, ZFP451, FGG, ZFP192, RASGRP1, DNER, RNFT2, SLIC39A8, CERK, SLIC30A9, ZC3H12C, LOC100045359, GALNTI14, SCO1, DNMT3A, KCNB1, ZFP386, FADS1, MRC2, SMG1, TRIM25, ZFP2, ITGA4, ZFP606, ATP13A3, ISL1, RIMKLA, CDKN1A, IRP1, RNF150, ZFP182, ZFP773, HPCA, IRP8, ZMYND17 |
| GO:0043169~cation binding                   | 88    | 0.04                                  | 1.19            | 0.83    | PXDN, GM6685, ITBP1, COPS5, BC027344, NPNT, ZFP334, UTRN, NCS1, RNF214, ZNRF1, MMP2, ZFP786, RBM4B, ZFP91, RNF219, TIMM9, RARB, TRPV6, SLIC12A7, 6330439K17RIK, REV1, SCN2B, PFKP, ZHX3, CPXM2, PCDH8, UBR1, MBNL1, GALNTL1, NUDT11, 5730601F06RIK, ZFP592, NEBL, ADAMTS9, ADAMTS8, CAMK4, PPM1K, ZDHHC13, ACAP2, FKBP14, ADAMTS3, STEAP1, ADD3, TRIM39, ADAMTS4, CYP1B1, ADAMTS19, AKAP13, MYO9A, TRIM11, ZFP317, CPZ, RNF160, ZFP451, FGG, ZFP192, RASGRP1, DNER, RNFT2, SLIC39A8, CERK, SLIC30A9, ZC3H12C, LOC100045359, GALNTI14, SCO1, DNMT3A, KCNB1, ZFP386, FADS1, MRC2, SMG1, TRIM25, ZFP2, ITGA4, ZFP606, ATP13A3, ISL1, RIMKLA, CDKN1A, IRP1, RNF150, ZFP182, ZFP773, HPCA, IRP8, ZMYND17 |

(continued)

Appendix Table 6. (continued)

|                                                                     |    |      |       |      |                                                                                                                                                                                                                                                                                                                                                                                                                                                                                                                                                                                                                                                                                                  |
|---------------------------------------------------------------------|----|------|-------|------|--------------------------------------------------------------------------------------------------------------------------------------------------------------------------------------------------------------------------------------------------------------------------------------------------------------------------------------------------------------------------------------------------------------------------------------------------------------------------------------------------------------------------------------------------------------------------------------------------------------------------------------------------------------------------------------------------|
| GO:0019208--phosphatase regulator activity                          | 4  | 0.04 | 5.25  | 0.81 | PHACTR1, SBF2, PPP2R2B, IGFBP3                                                                                                                                                                                                                                                                                                                                                                                                                                                                                                                                                                                                                                                                   |
| GO:0030695--GTPase regulator activity                               | 13 | 0.04 | 1.89  | 0.79 | ARHGEF3, RALGPS2, SIPA1L2, ARHGEF17, AKAP13, DGKI, MYO9A, ARHGAP25, PLEKHG1, KRIT1, RASGRP1, ACAP2, LOC100045359                                                                                                                                                                                                                                                                                                                                                                                                                                                                                                                                                                                 |
| GO:0060589--nucleoside-triphosphatase regulator activity            | 13 | 0.05 | 1.86  | 0.80 | ARHGEF3, RALGPS2, SIPA1L2, ARHGEF17, AKAP13, DGKI, MYO9A, ARHGAP25, PLEKHG1, KRIT1, RASGRP1, ACAP2, LOC100045359                                                                                                                                                                                                                                                                                                                                                                                                                                                                                                                                                                                 |
| GO:0008134--transcription factor binding                            | 11 | 0.05 | 2.01  | 0.78 | KAT2B, COPS5, DIP2C, ATP6V0A1, TRIB3, SMAD3, SKI, MED13, RBM39, NRIP1, PITX2                                                                                                                                                                                                                                                                                                                                                                                                                                                                                                                                                                                                                     |
| GO:0030528--transcription regulator activity                        | 32 | 0.05 | 1.39  | 0.76 | COPS5, E2F6, TRIB3, TAL2, MYCL1, POU5F2, ZFP192, RARB, POU3F1, SCX, PITX2, RHOX5, KAT2B, SSBP2, ZFP386, ARID3A, ZHX3, LEF1, SMAD3, TBX1, SKI, MED13, ISL1, FOXN3, NRIP1, GCFC1, CAMK4, CSRN2, IRF8, ATP6V0A1, FOXC2, RBM39                                                                                                                                                                                                                                                                                                                                                                                                                                                                       |
| GO:0043167--ion binding                                             | 88 | 0.05 | 1.17  | 0.74 | PXDN, GM6685, ITBP1, COPS5, BC027344, NPNT, ZFP334, UTRN, NCS1, RNF214, ZNRF1, MMP2, ZFP786, RBM4B, ZFP91, RNF219, TIMM9, RARB, TRPV6, SLC12A7, 6330439K17RIK, REV1, SCN2B, PFKP, ZHX3, CPXM2, PCDH8, UBR1, MBNL1, GAINTL1, NUDT11, 5730601F06RIK, ZFP592, NEBL, ADAMTS9, ADAMTS8, CAMK4, PPM1K, ZDHHC13, ACAP2, FKBP14, ADAMTS3, STEAP1, ADD3, TRIM39, ADAMTS4, CYT1B1, ADAMTS19, AKAP13, MYO9A, TRIM11, ZFP317, CPZ, RNF160, ZFP451, FGG, ZFP192, RASGRP1, DNER, RNFT2, SLC39A8, CERK, SLC30A9, ZC3H12C, LOC100045359, GAINTL14, SCO1, DNMT3A, KCNB1, ZFP386, FADS1, MRC2, SMG1, TRIM25, ZFP2, ITGA4, ZFP606, ATP13A3, ISL1, RIMKLA, CDKN1A, LRP1, RNF150, ZFP182, ZFP773, HPCA, IRP8, ZMYND17 |
| GO:0019902--phosphatase binding                                     | 3  | 0.05 | 7.88  | 0.74 | SBF2, SAPS3, DLG1                                                                                                                                                                                                                                                                                                                                                                                                                                                                                                                                                                                                                                                                                |
| GO:0008373--stailtransferase activity                               | 3  | 0.05 | 7.88  | 0.74 | ST6GALNAC6, ST6GALNAC3, ST8SIA2                                                                                                                                                                                                                                                                                                                                                                                                                                                                                                                                                                                                                                                                  |
| GO:0003712--transcription cofactor activity                         | 8  | 0.06 | 2.33  | 0.73 | KAT2B, COPS5, ATP6V0A1, TRIB3, SKI, MED13, RBM39, NRIP1                                                                                                                                                                                                                                                                                                                                                                                                                                                                                                                                                                                                                                          |
| GO:0043566--structure-specific DNA binding                          | 5  | 0.06 | 3.46  | 0.71 | SSBP2, SSBP1, FOXC2, SMAD3, HNRNPA1                                                                                                                                                                                                                                                                                                                                                                                                                                                                                                                                                                                                                                                              |
| GO:0005343--organic acid:sodium symporter activity                  | 3  | 0.06 | 7.16  | 0.74 | SLC6A9, SLC1A6, SLC6A13                                                                                                                                                                                                                                                                                                                                                                                                                                                                                                                                                                                                                                                                          |
| GO:0015171--amino acid transmembrane transporter activity           | 4  | 0.07 | 4.20  | 0.75 | SLC6A9, SLC7A3, SLC1A6, SLC6A13                                                                                                                                                                                                                                                                                                                                                                                                                                                                                                                                                                                                                                                                  |
| GO:0034481--chondroitin sulfotransferase activity                   | 2  | 0.07 | 26.26 | 0.75 | CHST11, CHST3                                                                                                                                                                                                                                                                                                                                                                                                                                                                                                                                                                                                                                                                                    |
| GO:0004190--aspartic-type endopeptidase activity                    | 3  | 0.09 | 5.84  | 0.81 | DDI2, NRIP3, H13                                                                                                                                                                                                                                                                                                                                                                                                                                                                                                                                                                                                                                                                                 |
| GO:0070001--aspartic-type peptidase activity                        | 3  | 0.09 | 5.84  | 0.81 | DDI2, NRIP3, H13                                                                                                                                                                                                                                                                                                                                                                                                                                                                                                                                                                                                                                                                                 |
| GO:0004601--peroxidase activity                                     | 3  | 0.10 | 5.63  | 0.82 | PXDN, PRDX6, PRDX4                                                                                                                                                                                                                                                                                                                                                                                                                                                                                                                                                                                                                                                                               |
| GO:0016684--oxidoreductase activity, acting on peroxide as acceptor | 3  | 0.10 | 5.63  | 0.82 | PXDN, PRDX6, PRDX4                                                                                                                                                                                                                                                                                                                                                                                                                                                                                                                                                                                                                                                                               |

(continued)

**Appendix Table 6. (continued)**

| Molecular Function Gene Ontology                  |       | Down in E12.5 Bud Compared with E15 Bud |                 |         |                                                                                                                                                                                                                                                                                                                                                                                                                                                                                                                                                                                                                                                                                                                                                                           |
|---------------------------------------------------|-------|-----------------------------------------|-----------------|---------|---------------------------------------------------------------------------------------------------------------------------------------------------------------------------------------------------------------------------------------------------------------------------------------------------------------------------------------------------------------------------------------------------------------------------------------------------------------------------------------------------------------------------------------------------------------------------------------------------------------------------------------------------------------------------------------------------------------------------------------------------------------------------|
| Term                                              | Count | P-value                                 | Fold Enrichment | Q-value | Genes                                                                                                                                                                                                                                                                                                                                                                                                                                                                                                                                                                                                                                                                                                                                                                     |
| GO:0016563~transcription activator activity       | 19    | 0.00                                    | 2.34            | 0.50    | MEF2A, KAT2B, COP55, NR4A2, SMAD3, LEF1, NFIX, TBX1, MED13, CITED4, CITED2, RNF6, CAMK4, ATP6V0A1, FOXC2, RARB, RBM39, POU3F1, NFIC                                                                                                                                                                                                                                                                                                                                                                                                                                                                                                                                                                                                                                       |
| GO:0019208~phosphatase regulator activity         | 6     | 0.01                                    | 4.79            | 0.87    | PHACTR1, TESC, PPP1R1B, SBF2, PPP2R2B, IGF1BP3                                                                                                                                                                                                                                                                                                                                                                                                                                                                                                                                                                                                                                                                                                                            |
| GO:0030528~transcription regulator activity       | 53    | 0.01                                    | 1.40            | 0.84    | E2F2, MEF2A, COP55, E2F6, PRRX1, RORC, CITED4, CITED1, CITED2, POU5F2, BHLHA15, HEY2, CREB3L4, RARB, NRG1, SCX, PITX2, SSBP2, ZHX3, LEF1, MED13, DMRTB1, FOXN3, NRIP1, ELL2, CAMK4, SPDEF, FOXC2, RBM39, TRIB3, NFIX, NR3C1, TAL2, MYCL1, TCEA3, ZFP192, POU3F1, KAT2B, RHOX5, ZFP386, NR4A2, ARID3A, SMAD3, SKI, TBX1, ISL1, GCFC1, RNF6, CSRN2, IRF8, FABP4, ATP6V0A1, NFIC                                                                                                                                                                                                                                                                                                                                                                                             |
| GO:0008373~sialyltransferase activity             | 4     | 0.02                                    | 6.39            | 0.95    | ST6GALINAC6, ST6GALINAC3, ST8SIA6, ST8SIA2                                                                                                                                                                                                                                                                                                                                                                                                                                                                                                                                                                                                                                                                                                                                |
| GO:0019841~retinol binding                        | 3     | 0.02                                    | 11.98           | 0.92    | RBP4, RBP7, RBP1                                                                                                                                                                                                                                                                                                                                                                                                                                                                                                                                                                                                                                                                                                                                                          |
| GO:0019888~protein phosphatase regulator activity | 5     | 0.03                                    | 4.32            | 0.91    | PHACTR1, TESC, PPP1R1B, PPP2R2B, IGF1BP3                                                                                                                                                                                                                                                                                                                                                                                                                                                                                                                                                                                                                                                                                                                                  |
| GO:0016918~retinal binding                        | 3     | 0.03                                    | 10.65           | 0.90    | RBP4, RBP7, RBP1                                                                                                                                                                                                                                                                                                                                                                                                                                                                                                                                                                                                                                                                                                                                                          |
| GO:0032403~protein complex binding                | 7     | 0.03                                    | 2.87            | 0.90    | GRB10, LYN, LGALS3, NPNT, ITGB1, ADORA1, PIK3R1                                                                                                                                                                                                                                                                                                                                                                                                                                                                                                                                                                                                                                                                                                                           |
| GO:0020037~heme binding                           | 10    | 0.04                                    | 2.22            | 0.89    | HBA-A1, CYP51, HBA-A2, GM6685, IPO, PXDN, CYP1B1, CYP2F2, FADS1, HBB-B1, CYP4B1                                                                                                                                                                                                                                                                                                                                                                                                                                                                                                                                                                                                                                                                                           |
| GO:0030246~carbohydrate binding                   | 17    | 0.04                                    | 1.71            | 0.89    | LY75, LMAN1L, LGALS3, FGF9, MRC2, PGIYRP1, PF4, GALNT1L, VIT, GPCPD1, A930038C07RIK, ADAMTS8, EGFLAM, CLEC2D, APOH, 2900064A13RIK, GALNT14                                                                                                                                                                                                                                                                                                                                                                                                                                                                                                                                                                                                                                |
| GO:0008289~lipid binding                          | 18    | 0.04                                    | 1.67            | 0.88    | BCO18465, RBP4, RBP7, RBP1, FFAR2, NR3C1, SEC14L4, MYO9A, ACBD3, PEX1, SBF2, RASGRP1, PSP, APOH, FABP4, SNX24, SNX10, HIP1                                                                                                                                                                                                                                                                                                                                                                                                                                                                                                                                                                                                                                                |
| GO:0046906~tetrapyrrole binding                   | 10    | 0.05                                    | 2.12            | 0.88    | HBA-A1, CYP51, HBA-A2, GM6685, IPO, PXDN, CYP1B1, CYP2F2, FADS1, HBB-B1, CYP4B1                                                                                                                                                                                                                                                                                                                                                                                                                                                                                                                                                                                                                                                                                           |
| GO:0005372~water transporter activity             | 3     | 0.05                                    | 7.99            | 0.89    | AQP5, SLC14A1, AQP3                                                                                                                                                                                                                                                                                                                                                                                                                                                                                                                                                                                                                                                                                                                                                       |
| GO:0046914~transition metal ion binding           | 96    | 0.05                                    | 1.18            | 0.87    | MOCOS, GM6685, BC027344, UTRN, ZFP334, RBM5, RORC, ZNR1, RNF214, MMP2, ZFP786, ISG20, ZFP91, RNF219, TIMM9, HBB-B1, RARB, DDAH1, 6330439K17RIK, PDXK, ZHX3, NUDT11, UBR1, NEBL, ZFP592, ADAMTS9, ADAMTS8, ACAP2, ADAMTS3, TRIM39, ADAMTS4, XDH, CYP1B1, AKAP13, MYO9A, ZFP451, RNF160, RNFT2, CASZ1, SLC31A2, SLC30A9, LOC100045359, DNMT3A, CRIP1, IPO, UPB1, NR4A2, SMG1, ZFP606, RIMKLA, CYP4B1, CDKN1A, RNF6, RNF150, ZFP773, PXDN, COP55, ALOX12E, MLPH, RBM4B, ZCCHC8, CPXM2, 5730601F06RIK, GALNT1L, MBNL1, DMRTB1, ZFP652, RNF180, PPM1K, ZDHHC13, STEAP1, CYP51, ADAMTS19, CYP2F2, NR3C1, CPZ, ZFP317, TRIM11, TCEA3, FTHL17, RASGRP1, ZFP192, SLC39A8, USP33, SCO1, GALNT14, ZC3H12C, FADS1, ZFP386, TRIM25, ZFP2, ISL1, HBA-A1, HBA-A2, ZFP182, PHF16, ZMYND17 |
| GO:0004601~peroxidase activity                    | 4     | 0.06                                    | 4.56            | 0.87    | IPO, PXDN, PRDX6, PRDX4                                                                                                                                                                                                                                                                                                                                                                                                                                                                                                                                                                                                                                                                                                                                                   |

(continued)

**Appendix Table 6. (continued)**

|                                                                     |    |      |       |      |                                                                                                                                                                                                                                     |
|---------------------------------------------------------------------|----|------|-------|------|-------------------------------------------------------------------------------------------------------------------------------------------------------------------------------------------------------------------------------------|
| GO:0016684--oxidoreductase activity, acting on peroxide as acceptor | 4  | 0.06 | 4.56  | 0.87 | LPO, PXDN, PRDX6, PRDX4                                                                                                                                                                                                             |
| GO:0003712--transcription cofactor activity                         | 11 | 0.06 | 1.95  | 0.85 | KAT2B, COP55, ATP6V0A1, TRIB3, SKI, MED13, RBM39, NRG1, CITED4, NRIP1, CITED2                                                                                                                                                       |
| GO:0005501--retinoid binding                                        | 3  | 0.06 | 7.37  | 0.85 | RBP4, RBP7, RBP1                                                                                                                                                                                                                    |
| GO:0019840--isoprenoid binding                                      | 3  | 0.06 | 7.37  | 0.85 | RBP4, RBP7, RBP1                                                                                                                                                                                                                    |
| GO:0030695--GTPase regulator activity                               | 18 | 0.06 | 1.59  | 0.85 | ARHGEF3, RALGPS2, MLPH, GPM3, SIPA1L2, ARHGEF17, AKAP13, TRIO, DOCK8, DGKI, MYO9A, ARHGAP25, PLEKHG1, RASGRP1, KRIT1, ACAP2, TBC1D30, LOC100045359                                                                                  |
| GO:0003700--transcription factor activity                           | 33 | 0.07 | 1.36  | 0.85 | E2F2, MEF2A, E2F6, PRRX1, RORC, NFIX, NR3C1, CITED1, CITED2, MYCL1, POU5F2, ZFP192, HEY2, CREB3L4, RARB, POU3F1, PITX2, RHOX5, NR4A2, ARID3A, ZHX3, LEF1, SMAD3, TBX1, ISL1, DMRTB1, FOXN3, GCFC1, CSRNP2, IRF8, SPDEF, FOXC2, NFIC |
| GO:0008376--acetylgalactosaminyltransferase activity                | 4  | 0.07 | 4.26  | 0.83 | CSGALNACT1, B4GALNT4, GALNTL1, GALNT14                                                                                                                                                                                              |
| GO:0005539--glycosaminoglycan binding                               | 8  | 0.07 | 2.24  | 0.82 | A930038C07RIK, EGFLAM, ADAMTS8, FGF9, PGLYRP1, APOH, PF4, VIT                                                                                                                                                                       |
| GO:0019825--oxygen binding                                          | 3  | 0.07 | 6.84  | 0.82 | HBA-A1, HBA-A2, CYP2F2, HBB-B1                                                                                                                                                                                                      |
| GO:0060589--nucleoside-triphosphatase regulator activity            | 18 | 0.07 | 1.57  | 0.81 | ARHGEF3, RALGPS2, MLPH, GPM3, SIPA1L2, ARHGEF17, AKAP13, TRIO, DOCK8, DGKI, MYO9A, ARHGAP25, PLEKHG1, RASGRP1, KRIT1, ACAP2, TBC1D30, LOC100045359                                                                                  |
| GO:0004857--enzyme inhibitor activity                               | 13 | 0.08 | 1.71  | 0.84 | PHACTR1, TESC, C3, TRIB3, DGKI, SERPIN1, WFDC12, CDKN1A, BC048546, PPP1R1B, SERPINB12, EXPI, WFDC3                                                                                                                                  |
| GO:0003697--single-stranded DNA binding                             | 4  | 0.08 | 3.87  | 0.84 | SSBP2, SSBP1, CSDA, HNRNP1A                                                                                                                                                                                                         |
| GO:0043566--structure-specific DNA binding                          | 6  | 0.09 | 2.52  | 0.85 | SSBP2, SSBP1, FOXC2, SMAD3, CSDA, HNRNP1A                                                                                                                                                                                           |
| GO:0043125--ErbB-3 class receptor binding                           | 2  | 0.09 | 21.29 | 0.84 | NRG1, PIK3R1                                                                                                                                                                                                                        |
| GO:0003713--transcription coactivator activity                      | 7  | 0.09 | 2.24  | 0.84 | KAT2B, COP55, ATP6V0A1, MED13, RBM39, CITED4, CITED2                                                                                                                                                                                |

**KEGG Pathways**

| Term                                                        | Count | P-value | Fold Enrichment | Q-value | Genes                                                                                    |
|-------------------------------------------------------------|-------|---------|-----------------|---------|------------------------------------------------------------------------------------------|
| Up in E12.5 Bud Compared with E15 Bud                       |       |         |                 |         |                                                                                          |
| mmu05200:Pathways in cancer                                 | 13    | 0.02    | 2.16            | 0.84    | WNT10A, MAP2K1, FGF9, SMAD3, LEF1, ITGA3, FGF21, MMP2, VEGFC, LAMA1, CDKN1A, RARB, TCEB1 |
| mmu05219:Bladder cancer                                     | 4     | 0.04    | 5.11            | 0.92    | VEGFC, CDKN1A, MAP2K1, MMP2                                                              |
| mmu05412:Arrhythmic right ventricular cardiomyopathy (ARVC) | 5     | 0.05    | 3.58            | 0.86    | ITGA9, SGCG, LEF1, ITGA3, ITGA4                                                          |
| mmu00561:Glycerolipid metabolism                            | 4     | 0.06    | 4.56            | 0.81    | ALDH2, LCLAT1, DGKI, AGPAT4                                                              |
| mmu04512:ECM-receptor interaction                           | 5     | 0.07    | 3.23            | 0.80    | ITGA9, LAMA1, NPNT, ITGA3, ITGA4                                                         |

(continued)



**Appendix Table 6. (continued)**

| mmu04670:Leukocyte transendothelial migration               | 6     | 0.07    | 2.70            | 0.75    | ICAM1, CLDN11, MSN, ITGA4, MMP2, JAM3                                                                          |
|-------------------------------------------------------------|-------|---------|-----------------|---------|----------------------------------------------------------------------------------------------------------------|
| mmu00512:O-Glycan biosynthesis                              | 3     | 0.09    | 5.96            | 0.79    | GAINTL1, GCNT1, GAINTL14                                                                                       |
| KEGG Pathways Down in E12.5 Bud Compared with E15 Bud       |       |         |                 |         |                                                                                                                |
| Term                                                        | Count | P-value | Fold Enrichment | Q-value | Genes                                                                                                          |
| mmu04670:Leukocyte transendothelial migration               | 10    | 0.01    | 2.79            | 0.73    | ICAM1, CLDN19, GNAI1, CLDN11, MSN, ITGA4, ITGB1, MMP2, JAM3, PIK3R1                                            |
| mmu05219:Bladder cancer                                     | 5     | 0.04    | 3.95            | 0.93    | E2F2, VEGFC, CDKN1A, MAP2K1, MMP2                                                                              |
| mmu04512:ECM-receptor interaction                           | 7     | 0.04    | 2.80            | 0.84    | ITGA9, LAMA1, NPNT, ITGA3, ITGA4, ITGB1, THBS4                                                                 |
| mmu04360:Axon guidance                                      | 9     | 0.04    | 2.28            | 0.78    | PLXNA4, GNAI1, UNC5A, PLXNA2, SEMA4F, EFNB1, NTNG1, ITGB1, EPHB1                                               |
| mmu04530:Tight junction                                     | 9     | 0.05    | 2.21            | 0.76    | CLDN19, MAGI2, GNAI1, MPDZ, SPNB2, CLDN11, PPP2R2B, CSDA, JAM3                                                 |
| mmu00010:Glycolysis / Gluconeogenesis                       | 6     | 0.05    | 2.93            | 0.72    | ACSS1, ALDOC, FBP1, ALDH2, PFKF, ALDH3B1                                                                       |
| mmu05200:Pathways in cancer                                 | 16    | 0.06    | 1.64            | 0.71    | WNT10A, E2F2, MAP2K1, FGF9, SMAD3, LEFT1, ITGA3, FGF21, ITGB1, MMP2, VEGFC, LAMA1, CDKN1A, RARB, TCEB1, PIK3R1 |
| mmu05218:Melanoma                                           | 6     | 0.06    | 2.80            | 0.67    | E2F2, CDKN1A, MAP2K1, FGF9, FGF21, PIK3R1                                                                      |
| mmu04666:Fc gamma R-mediated phagocytosis                   | 7     | 0.07    | 2.37            | 0.70    | MAP2K1, LYN, WASF2, INPP5D, PIK3R1, AMPH, LOC100045359                                                         |
| mmu05412:Arrhythmic right ventricular cardiomyopathy (ARVC) | 6     | 0.07    | 2.65            | 0.66    | ITGA9, SGCG, LEFT1, ITGA3, ITGA4, ITGB1                                                                        |

We generated the gene list by identifying genes whose expression differed 10-fold or higher between the E12.5 and E15 buds. This list was analyzed by DAVID (Database for Annotation, Visualization and Integrated Discovery) to identify overrepresented pathways and molecular function gene ontology terms. P-value for the group of genes was calculated by DAVID with a modified Fisher's Exact test (EASE-score). Fold enrichment was defined as the ratio of the percentage of the genes belonging to the pathway/term in the gene list analyzed compared with the percentage that would be expected by chance alone, and the Benjamini-Hochberg procedure was used to determine the false discovery rate (Q-value).

**Appendix Table 7.** Primer Sequences (Forward and Reverse) used for qPCR Validation of Microarray Data

| Gene                                                                                                                                                    | Sense Primer               | Anti-sense Primer               |
|---------------------------------------------------------------------------------------------------------------------------------------------------------|----------------------------|---------------------------------|
| <i>Mus musculus</i> aquaporin 5 mRNA. <b>Aqp5</b>                                                                                                       | GCCGTGGTGGGAGTAAATCTTG     | CCAGTGTACCGACAAAGCCAATG         |
| <i>Mus musculus</i> cadherin 1 mRNA. <b>Cdh1</b>                                                                                                        | GACTAGGCTATCTCAACCAAT      | CCATCAAGAGCAGGCATT              |
| <i>Mus musculus</i> cystic fibrosis transmembrane conductance regulator mRNA, complete cds. <b>Cfr</b> <sup>a</sup>                                     | AGACCATCTAGCCCTACTACC      | ACTAAACAACAACCTCCCTCAC          |
| <i>Mus musculus</i> catenin (cadherin associated protein) beta 1, transcript variant 1, mRNA. <b>Cnmb1</b> <sup>b</sup>                                 | GCGGTAGGGTAAATCAGTAAAG     | GCACTGTITGAAGCATTGTATC          |
| <i>Mus musculus</i> demilune cell and parotid protein 1 mRNA. <b>Dcpp1</b> <sup>a,b</sup>                                                               | CCTACTGATCTTGCCTTCTT       | CGTCCITGTTGCATCAIAGT            |
| <i>Mus musculus</i> demilune cell and parotid protein 2 mRNA. <b>Dcpp2</b>                                                                              | CCTACTGATCTTGCCTTCTT       | CCGTCCCTCGTTGCATATAG            |
| <i>Mus musculus</i> demilune cell and parotid protein 3 mRNA. <b>Dcpp3</b>                                                                              | CCTACTGATCTTGCCTTCTT       | AGTTGAGCCATACACTTGAC            |
| <i>Mus musculus</i> dickkopf homolog 3 ( <i>Xenopus laevis</i> ) mRNA. <b>Dkk3</b>                                                                      | ACCGCAGTAAAGATGAGT         | ATGCTTGGAAACAGAAITGGATT         |
| <i>Mus musculus</i> epidermal growth factor receptor mRNA, complete cds. <b>Egfr</b>                                                                    | GAGTCCAGACAAGACATC         | CTCACAAAGTAGTGGACAATC           |
| <i>Mus musculus</i> fibroblast growth factor receptor 2, transcript variant 2, mRNA. <b>Fgfr2</b> <sup>a,b</sup>                                        | GCATCATCGGTTGAGAGT         | TGTGAGGTGAGGCTTGT               |
| <i>Mus musculus</i> glycogen synthase kinase 3 beta mRNA. <b>GSK3</b>                                                                                   | GTCACACTGCCGTCTCCACTCC     | AGCTGCACCTCCTGTACACATC          |
| <i>Mus musculus</i> integrin alpha 6, mRNA. <b>Itgab6</b>                                                                                               | GTGCTAACAGAGTGGCTATC       | CTATCCATGGCAGTCTTGAG            |
| <i>Mus musculus</i> potassium intermediate/small conductance calcium-activated channel, subfamily N, member 4, transcript variant 2, mRNA. <b>Kcnn4</b> | CACAGAAGAACCAGGCTAAG       | GGAGGTCCAATTCAGTGTGTC           |
| <i>Mus musculus</i> keratin 17 mRNA. <b>Krt17</b>                                                                                                       | TCAGGATGGCAAGGTCAT         | CACAGTTCACITCAGGTCAG            |
| <i>Mus musculus</i> keratin 18 mRNA. <b>Krt18</b>                                                                                                       | GTGTCAACCACCAAGTCTG        | TGTTCTCCAAGTTGATGTTCTG          |
| <i>Mus musculus</i> keratin 7 mRNA. <b>Krt7</b>                                                                                                         | CCTATCCATCAAGACCCACATC     | AGCCAAACAGCAGTTTCAG             |
| <i>Mus musculus</i> keratin 8 mRNA. <b>Krt8</b>                                                                                                         | GGCTGTGGTGTGAAGAA          | CACITGGACACGACATCAG             |
| <i>Mus musculus</i> laminin, beta 3 mRNA. <b>Lamb3</b>                                                                                                  | GTCTCCACCATTGATAGCATAG     | GGCACATGTCCATTCCTCA             |
| <i>Mus musculus</i> matrix metalloproteinase 2 mRNA. <b>Mmp2</b>                                                                                        | CCTTGGTGCTCCACTCTCTGGTCTTC | CAGTCCCTCTTAAGCCAGTCTACTATTAAAC |
| <i>Mus musculus</i> prolactin induced protein mRNA. <b>Pip</b>                                                                                          | ACAAACCCGGCTCTGTAATG       | GCCTCCGTTAATTCATTCGCACAG        |
| <i>Mus musculus</i> sodium channel, nonvoltage-gated 1 alpha mRNA. <b>Scnn1a</b>                                                                        | CTCCACTGCCTATGCTA          | GGAAAGATGCTGAAAGTGA             |
| <i>Mus musculus</i> submandibular gland protein C mRNA. <b>Simgc</b>                                                                                    | TGCCACAGTCCAGGGTCAACAAG    | CAGCCAGATCCCACGGTCTCC           |
| <i>Mus musculus</i> wingless-related MMTV integration site 10a mRNA. <b>Wnt10a</b>                                                                      | AGGTGGTTGGCTTTACA          | AGATGACAGGAGGTAGGC              |
| <i>Mus musculus</i> ribosomal protein S29 mRNA. <b>RPS29</b> <sup>c</sup>                                                                               | ATGGGTACACCAAGCAGCTCTACTG  | GGAAAGCACTGGCGGCACATG           |
| <i>Mus musculus</i> wingless-related MMTV integration site 6 mRNA. <b>Wnt6</b> <sup>b</sup>                                                             | GTCTATCATCCACCTGTIACC      | GACGCCTGACAACCTAAGC             |

Key: a - used for validating E12.5 duct vs. E15 main duct expression; b - used for validating E12.5 bud vs. E12.5 main duct expression; c - gene used to normalize expression. The bolded text in column 1 is the gene symbol.

**Appendix Table 8.** Differential Gene Expression between Locations Identified by ANOVA**E12.5 Arrays** (25378 genes present, 3841 pass through ANOVA)

|           | Bud  | Cleft |
|-----------|------|-------|
| Bud       | –    | 682   |
| Main duct | 2028 | 2519  |

**E13.5 Arrays** (22067 genes present, 3698 pass through ANOVA)

|                | Central Bud | Secondary Duct | Main Duct | Cleft |
|----------------|-------------|----------------|-----------|-------|
| Central bud    | –           | 255            | 1889      | 241   |
| Peripheral bud | 34          | 752            | 2340      | 104   |
| Cleft          | 241         | 473            | 1768      | –     |
| Secondary duct | 255         | –              | 357       | 473   |

**E14 Arrays** (18613 genes present, 2283 pass through ANOVA)

|           | Bud  | Secondary Duct |
|-----------|------|----------------|
| Bud       | –    | 912            |
| Main duct | 1275 | 807            |

**E15 Arrays** (17656 genes present, 5313 pass through ANOVA)

|           | Bud  | Secondary Duct |
|-----------|------|----------------|
| Bud       | –    | 2358           |
| Main duct | 3247 | 1860           |

Numbers at intersections show number of genes expressed differently between the 2 locations as identified by Tukey's *post hoc* test.
